# Supplementary material
Source: ML conference proceedings conference paper supplement (https://proceedings.mlr.press/v119/ding20a.html)
Supplement: Supplementary file [file ding20a-supp.pdf]

---

## Appendices to ‘‘Spectral Frank-Wolfe Algorithm: Strict Complementarity and Linear Convergence’’

---

### A. Uniqueness assumption

Here we discuss how to adapt our results to multiple solution setting. First of all, if there are multiple solution, the strict complementarity condition means that there is a primal optimal solution  $X_*$  such that

$$\text{rank}(X_*) + \text{rank}(Z_*) = n.$$

Thus we should set  $r_*$  to be the maximal rank among all primal solutions. Denote the set of primal optimal solution of Problem (1) as  $\mathcal{X}_*$ . Quadratic growth in this situation is understood as

$$f(X) - f(X_*) \geq \gamma \inf_{X_* \in \mathcal{X}_*} \|X - X_*\|_F =: \text{dist}(X, \mathcal{X}_*),$$

for any  $X \succeq 0$  and  $\text{tr}(X) = 1$ . Now due to strict complementarity, we still have  $r_* = k_*$  (dual solution  $Z_*$  is unique as shown in the next section). Theorem 3 can be now be proved in the exactly same way by considering the nearest  $X_* \in \mathcal{X}_*$  to  $X_t$  without the uniqueness assumption. To prove Theorem 6, the argument follows exactly as the main proof by considering the nearest  $X_* \in \mathcal{X}_*$  to  $X$ , and replacing Lemma 6 by Lemma 7. In this case, the parameter  $\gamma$  of quadratic growth is

$\gamma = \min \left\{ \frac{\lambda_{n-r_*}(Z_*)}{4+8 \frac{\sigma_{\max}^2(\mathcal{A})}{\mu^2}}, \frac{\alpha\mu^2}{8} \right\}$  where  $\mu := \sup\{a \geq 0 \mid a \cdot \text{dist}(X, \mathcal{X}_*) \leq \|\tilde{\mathcal{A}}(X) - b\|_2 \text{ for all } X \in \mathcal{C}_{r_*}(Z_*)\}$  and is indeed positive using Lemma 7.

### B. Lemmas for Section 2

**Lemma 1.** *The dual solution  $(Z_*, s_*)$  of Problem (1) is unique even if the primal solution is not unique.*

*Proof.* We first show that for any primal solution  $X_*$ , its gradient  $\nabla f(X_*)$  is the same. Using  $\beta$ -smoothness of  $f$  (the constant  $\beta$  can be taken to be  $\|\mathcal{A}\|_{\text{op}}^2 L_g$ ), we have for any optimal  $X_*$  and  $X'_*$

$$\begin{aligned} & \langle X_* - X'_*, \nabla f(X_*) - \nabla f(X'_*) \rangle \\ & \geq \frac{1}{\beta} \|\nabla f(X_*) - \nabla f(X'_*)\|_F^2. \end{aligned} \tag{1}$$

Since  $X_*$  and  $X'_*$  are optimal solution, we have the following two inequalities using the optimality

$$\langle X_* - X'_*, \nabla f(X_*) \rangle \leq 0, \tag{2}$$

$$\langle X'_* - X_*, \nabla f(X'_*) \rangle \leq 0. \tag{3}$$

Combining the inequalities (1), (2), and (3), we have

$$\|\nabla f(X_*) - \nabla f(X'_*)\|_F \leq 0 \implies f(X_*) = f(X'_*). \tag{4}$$

This shows that  $\nabla f(X_*)$  is unique. Now for any  $Z_*, s_*$  and  $Z'_*, s'_*$  satisfying the KKT condition, we have

$$\begin{aligned} \nabla f(X_*) + C &= Z_* + s_* I \\ &= Z'_* + s'_* I \\ \implies Z_* - Z'_* &= (s'_* - s_*) I. \end{aligned} \tag{5}$$

Now using complementarity in step (a) and feasibility of  $X_*$  in step (b):

$$\begin{aligned}
 0 &\stackrel{(a)}{=} \langle Z_* - Z'_*, X_* \rangle = (s'_* - s_*) \langle I, X_* \rangle \\
 &\stackrel{(b)}{=} (s'_* - s_*) \\
 \implies & s_* = s'_*, \quad \text{and} \quad Z_* = Z'_*.
 \end{aligned} \tag{6}$$

Hence the dual solution  $Z_*$  and  $s_*$  is unique.  $\square$

**Lemma 2.** For almost all  $C$ , the strict complementarity condition holds for (1).

*Proof.* Let us first define indicator function: for any given  $D \subset \mathbb{R}^n$ , we define

$$\chi_C(x) = \begin{cases} 0, & x \in D \\ +\infty, & x \notin D. \end{cases}$$

Also denote the relative interior of a set  $D$  as  $\text{relint}(D)$ . We utilize the result in [Drusvyatskiy & Lewis \(2011, Corollary 3.5\)](#), that for almost all  $C$ , we have

$$\begin{aligned}
 & -C \in \text{relint}(\partial(g(\mathcal{A}X) \\
 & \quad + \chi_{\{\text{tr}(X)=1\}}(X) + \chi_{\{X \succeq 0\}}(X))(X_*)) \\
 & \stackrel{(a)}{=} \text{relint}(\mathcal{A}^*(\nabla g)(\mathcal{A}X_*) + \{sI \mid s \in \mathbb{R}\} \\
 & \quad + \{-Z \mid Z \succeq 0, \text{range}(Z) \subset \text{nullspace}(X_*)\}) \\
 & \stackrel{(b)}{=} \mathcal{A}^*(\nabla g)(\mathcal{A}X_*) + C + \{sI \mid s \in \mathbb{R}\} \\
 & \quad + \{-Z \mid Z \succeq 0, \text{range}(Z) = \text{nullspace}(X_*)\}.
 \end{aligned} \tag{7}$$

Here we use the sum rule in step (a) as  $\frac{1}{n}I$  is in  $\{X \mid \text{tr}(X) = 1\}$  and the interior of  $\{X \mid X \succeq 0\}$ . In step (b), we use the sum rule of relative interior. Hence, there is some  $s_*$  and  $Z_*$  such that

$$\begin{aligned}
 & \text{range}(Z_*) = \text{nullspace}(X_*) \\
 \implies & \langle Z_*, X_* \rangle = 0, \quad \text{and} \\
 & \text{rank}(Z_*) + \text{rank}(X_*) = n.
 \end{aligned} \tag{8}$$

and

$$\mathcal{A}^*(\nabla g)(\mathcal{A}X_*) + C = Z_* + s_*I.$$

We thus conclude  $(Z_*, s_*)$  satisfies the KKT condition (3), and strict complementarity holds.  $\square$

### C. SpecFW: minimizing an upper bound of $f(\eta X_t + VSV^\top)$ .

When the function  $f$  is not fully known or gradient might be hard to query, we may consider the following subproblem instead: solve

$$\begin{aligned}
 & \text{minimize} \quad g(\mathcal{A}X_t) \\
 & \quad + \langle \mathcal{A}(\eta X_t + VSV^\top) - \mathcal{A}X_t, (\nabla g)(\mathcal{A}X_t) \rangle \\
 & \quad + \frac{L_g}{2} \|\mathcal{A}(\eta X_t + VSV^\top) - \mathcal{A}X_t\|_2^2 \\
 & \quad + \langle C, \eta X_t + VSV^\top \rangle \\
 & \text{subject to} \quad \eta + \text{tr}(S) = 1, \quad S \succeq 0, \quad \text{and} \quad \eta \geq 0.
 \end{aligned} \tag{9}$$

with decision variable  $S$  and  $\eta$ . Then set  $X_{t+1} = \eta X_t + VSV^\top$  for the optimal  $\eta$  and  $S$ .

The above formulation enjoys the advantage of efficient computation in terms of time when  $m$  is small and the linear map  $\mathcal{A}$  and  $\langle C, \cdot \rangle$  are easy to apply to low rank matrices. One may also save  $\mathcal{A}X_t$  during the process to avoid forming  $X_t$  and sketching  $X_t$  using idea from [Tropp et al. \(2017\)](#) for storage purpose.

One could also consider solving

$$\begin{aligned}
 & \text{minimize} && f(X_t) \\
 & && + \langle \eta X_t + VSV^\top - X_t, \nabla f(X_t) \rangle \\
 & && + \frac{L_f}{2} \|X_t - (\eta X_t + VSV^\top)\|_F \\
 & \text{subject to} && \eta + \text{tr}(S) = 1, \quad S \succeq 0, \quad \text{and } \eta \geq 0.
 \end{aligned} \tag{10}$$

Then set  $X_{t+1} = \eta X_t + VSV^\top$  for the optimal  $\eta$  and  $S$ . Here  $L_f$  is the Lipschitz constant of  $\nabla f$ . This method requires to store  $X_t$  in each iteration though.

#### D. Combination with matrix sketching idea in Tropp et al. (2017)

When  $m$  is on the order  $n$ , we can employ the matrix sketching idea developed in Tropp et al. (2017) and Yurtsever et al. (2017) to achieve storage reduction. We note that if we store  $\mathcal{A}(X_t) = z_t$  and  $c_t = \langle C, X_t \rangle$  at each iteration, then we have no problem in doing the small-scale SDP (10), as  $f(\eta X_t + VSV^\top) = g(\eta(\mathcal{A}X_t) + \mathcal{A}(VSV^\top)) + \eta \langle C, X_t \rangle + \langle C, VSV^\top \rangle$ . If  $\mathcal{A}$  and inner product with  $C$  can be applied to low rank matrices efficiently, then updating  $z_t$  and  $c_t$  is not hard due to linearity of our updating scheme  $X_{t+1} = \eta X_t + VSV^\top$ .

Now we explain how to omit storing the iterate  $X_t$ . First, we draw two matrices with independent standard normal entries

$$\begin{aligned}
 \Psi &\in \mathbb{R}^{n \times k} && \text{with } k = 2r + 1; \\
 \Phi &\in \mathbb{R}^{l \times n} && \text{with } l = 4r + 3;
 \end{aligned}$$

Here  $r$  is chosen by the user. It either represents the estimate of the true rank of the primal solution or the user’s computational budget in dealing with larges matrices.

We use  $Y_t^C$  and  $Y_t^R$  to capture the column space and the row space of  $X_t$ :

$$Y_t^C = X_t \Psi \in \mathbb{R}^{n \times k}, \quad Y_t^R = \Phi X_t \in \mathbb{R}^{l \times n}. \tag{11}$$

Hence we initially have  $Y_0^C = 0$  and  $Y_0^R = 0$ . Notice that SpecFW does not observe matrix  $X_t$  directly. Rather, it observes a stream of rank  $k$  updates

$$X_{t+1} = VSV^\top + \eta X_t,$$

where  $V \in \mathbb{R}^n \times k$  and  $S \in \mathbb{S}^k$ .

In this setting,  $Y_{t+1}^C$  and  $Y_{t+1}^R$  can be directly computed as

$$Y_{t+1}^C = VS(V^\top \Psi) + \eta Y_t^C \in \mathbb{R}^{n \times k}, \tag{12}$$

$$Y_{t+1}^R = (\Psi V)SV^\top + \eta Y_t^R \in \mathbb{R}^{l \times n}. \tag{13}$$

This observation allows us to form the sketch  $Y_t^C$  and  $Y_t^R$  from the stream of updates.

We then reconstruct  $X_t$  and get the reconstructed matrix  $\hat{X}_t$  by

$$Y_t^C = Q_t R_t, \quad B_t = (\Phi Q_t)^\dagger Y_t^R, \quad \hat{X}_t = Q_t [B_t]_r, \tag{14}$$

where  $Q_t R_t$  is the  $QR$  factorization of  $Y_t^C$  and  $[\cdot]_r$  returns the best rank  $r$  approximation in Frobenius norm. Specifically, the best rank  $r$  approximation of a matrix  $Z$  is  $U\Sigma V^*$ , where  $U$  and  $V$  are right and left singular vectors corresponding to the  $r$  largest singular values of  $Z$  and  $\Sigma$  is a diagonal matrix with  $r$  largest singular values of  $Z$ . In actual implementation, we may only produce the factors  $(QU, \Sigma, V)$  defining  $\hat{X}_T$  in the end instead of reconstructing  $\hat{X}_t$  in every iteration. We refer the reader to Tropp et al. (2017, Theorem 5.1) for the theoretical guarantees on the reconstruction matrix  $\hat{X}_t$ .

Hence we can avoid the *forming a new iterate* procedure in SpecFW. We remark that the reconstructed matrix  $\hat{X}_t$  is not necessarily positive semidefinite. However, this suffices for the purpose of finding a matrices close to  $X_t$ . More sophisticated procedure is available for producing a positive semidefinite approximation of  $X_t$  (Tropp et al., 2017, Section 7.3).

## E. Proofs for Section 3

We first give the detailed calculation of the derivation for (12).

*Continuation of proof of Theorem 3.* We need to choose  $\xi \in [0, 1]$  so that  $1 - \xi + \frac{\xi^2\beta}{\gamma}$  is minimized while keeping  $\xi^2\beta - \frac{\xi\lambda_{n-r_*}(Z_*)}{6} \leq 0$ . For  $\xi^2\beta - \frac{\xi\lambda_{n-r_*}(Z_*)}{6} \leq 0$ , we need  $\xi \leq \frac{\lambda_{n-r_*}(Z_*)}{6\beta}$ . The function  $q(\xi) = 1 - \xi + \frac{\xi^2\beta}{\gamma}$  is decreasing for  $\xi \leq \frac{\gamma}{2\beta}$  and increasing for  $\xi \geq \frac{\gamma}{2\beta}$ . If  $\frac{\gamma}{2\beta} \leq \frac{\lambda_{n-r_*}(Z_*)}{6\beta}$ , then we can pick  $\xi = \frac{\gamma}{2\beta}$ , and  $q(\xi) = 1 - \frac{\gamma}{4\beta}$ . If  $\frac{\gamma}{2\beta} \geq \frac{\lambda_{n-r_*}(Z_*)}{6\beta} \implies \frac{\lambda_{n-r_*}(Z_*)}{\gamma} \leq 3$ , then we can pick  $\xi = \frac{\lambda_{n-r_*}(Z_*)}{6\beta}$ , and  $q(\xi) = 1 - \frac{\lambda_{n-r_*}(Z_*)}{6\beta} + \frac{\lambda_{n-r_*}^2(Z_*)}{36\gamma\beta} = 1 + \frac{\lambda_{n-r_*}(Z_*)}{6\beta} \left( \frac{\lambda_{n-r_*}(Z_*)}{6\gamma} - 1 \right) \leq 1 - \frac{\lambda_{n-r_*}(Z_*)}{12\beta}$ .  $\square$

We shall prove Lemma 5 in this section. We restate Lemma 5 in a self-contained way.

**Lemma 3.** *Suppose  $Y \in \mathbb{S}^n$  with eigenvalues  $\lambda_1(Y) \geq \dots \geq \lambda_n(Y)$ , and  $\lambda_{n-r}(Y) - \lambda_{n-r+1}(Y) \geq \delta$ . Here  $\lambda_i(\cdot)$  denote the operator of taking the  $i$ -th largest eigenvalue. Also let  $v_1, \dots, v_n$  be the corresponding orthonormal eigenvectors. Denote the eigenspace corresponding to the last reigenvalue of  $Y$  as  $\mathcal{V}_{Y,r}$  and the corresponding orthogonal projection  $P_{Y,r} : \mathbb{R}^n \rightarrow \mathbb{R}^n$  which is also a matrix in  $\mathbb{R}^{n \times n}$ . Let  $V_{Y,r} \in \mathbb{R}^{n \times r}$  formed by the last  $r$  many eigenvectors  $v_{n-r+1}, \dots, v_n$  which represents the eigensapce  $\mathcal{V}_{Y,r}$ . Define  $\mathcal{C}_r(Y) = \{V_{Y,r}SV_{Y,r}^\top \mid S \succeq 0, \text{tr}(S) = 1\}$ . Then for any  $X \in \mathbb{S}^n$  with  $\text{tr}(X) = 1, X \succeq 0$ , there is some  $W \in \mathcal{C}_r(Y)$  such that*

$$\langle X - W, Y \rangle \geq \frac{\delta}{2} \|X - W\|_F^2.$$

**Remark 4.** *We note that as long as  $\text{range}(V) = \text{range}(V_{Y,r})$  for some matrix  $V \in \mathbb{R}^{n \times r}$  with orthonormal columns, the set  $\mathcal{C}_r(Y)$  is the same as  $\{VSV^\top \mid S \succeq 0, \text{tr}(S) = 1\}$ .*

*Proof of Lemma 5.* We first decompose  $X$  by

$$X = \underbrace{(X - P_{Y,r}XP_{Y,r})}_{X_1} + \underbrace{P_{Y,r}XP_{Y,r}}_{=:X_2}.$$

Note that  $P_{Y,r} = P_{Y,r}^\top$ , so  $X_2 = P_{Y,r}XP_{Y,r}$  is still symmetric. Let  $1 - \epsilon = \text{tr}(P_{Y,r}XP_{Y,r})$ . Since  $\text{tr}(X) = 1$ , we have  $\epsilon = \text{tr}(X - P_{Y,r}XP_{Y,r})$ . We have  $\epsilon \in [0, 1]$  as  $\text{tr}(P_{Y,r}XP_{Y,r}) = \langle X, P_{Y,r}P_{Y,r} \rangle \stackrel{(a)}{\leq} \|P_{Y,r}\|_{\text{op}} \text{tr}(X) \leq 1$  where step (a) is due to Hölder’s inequality.

Consider the eigenvalue decomposition of  $X_2 = V_2\Lambda_2V_2^\top$ , where  $V_2 \in \mathbb{R}^{n \times r}$  and  $\Lambda_2 \in \mathbb{S}^r$  with all diagonal nonnegative. Here the column space of  $V_2$  satisfies  $\text{range}(V_2) = \mathcal{V}_{Y,r}$ .

Because  $P_{Y,r}XP_{Y,r} = X_2$  is a member in  $\mathcal{C}_r(Y)$ , we know there is an  $W \in \mathcal{C}_r(Y)$  such that  $W = V_2\Lambda_WV_2^\top$  where  $\Lambda_W \in \mathbb{S}^r$  has nonnegative diagonal with  $\text{tr}(\Lambda_W) = 1$  and the difference matrix  $\Delta = \Lambda_W - \Lambda_2$  has nonnegative entries. We also have  $\text{tr}(\Delta) = \epsilon$ , as the trace of both  $\Lambda_W$  and  $X$  are one.

With such choice of  $W$ , let us now analyze  $\langle X - W, Y \rangle$ :

$$\begin{aligned} \langle X - W, Y \rangle &= \langle X_1, Y \rangle + \langle X_2 - W, Y \rangle \\ &= \underbrace{\langle X - P_{Y,r}XP_{Y,r}, \sum_{i=1}^n \lambda_i(Y)v_iv_i^\top \rangle}_{R_1} \\ &\quad - \underbrace{\langle V_2\Delta V_2^\top, \sum_{i=1}^n \lambda_i(Y)v_iv_i^\top \rangle}_{R_2}. \end{aligned} \tag{15}$$

The first term  $R_1 = \langle X - P_{Y,r} X P_{Y,r}, \sum_{i=1}^n \lambda_i(Y) v_i v_i^\top \rangle$  satisfies

$$\begin{aligned}
 & \langle X - P_{Y,r} X P_{Y,r}, \sum_{i=1}^n \lambda_i(Y) v_i v_i^\top \rangle \\
 & \stackrel{(a)}{=} \sum_{i=1}^n \lambda_i(Y) v_i^\top X v_i - \sum_{i=n-r+1}^n \lambda_i(Y) v_i^\top X v_i \\
 & = \sum_{i=1}^{n-r} \lambda_i(Y) v_i^\top X v_i \\
 & \stackrel{(b)}{\geq} (\lambda_{n-r+1}(Y) + \delta) \sum_{i=1}^{n-r} v_i^\top X v_i.
 \end{aligned}$$

Here in step (a) we use the fact that  $P_{Y,r} v_i = v_i$  for  $i = n - r + 1, \dots, n$  and is zero for other  $v_i$ . In step (b), we use the assumption that  $\lambda_{n-r} - \lambda_{n-r+1} \geq \delta$  and each  $v_i^\top X v_i \geq 0$  as  $X \succeq 0$ . We note that  $\sum_{i=1}^{n-r} v_i^\top X v_i$  satisfies

$$\begin{aligned}
 \sum_{i=1}^{n-r} v_i^\top X v_i &= \mathbf{tr} \left( X \left( \sum_{i=1}^{n-r} v_i v_i^\top \right) \right) \stackrel{(a)}{=} \mathbf{tr}(X(I - P_{Y,r})) \\
 & \stackrel{(b)}{=} \mathbf{tr}(X) - \mathbf{tr}(P_{Y,r} X P_{Y,r}) = \epsilon.
 \end{aligned}$$

Here step (a) uses the  $P_{Y,r} = V_{Y,r} V_{Y,r}^\top$  and we use  $P_{Y,r}^2 = P_{Y,r}$  and cyclic property of trace in step (b).

Now let us analyze the second term  $R_2$ :

$$\begin{aligned}
 R_2 &= \langle V_2 \Delta V_2^\top, \sum_{i=1}^n \lambda_i(Y) v_i v_i^\top \rangle \\
 & \stackrel{(a)}{=} \langle V_2 \Delta V_2^\top, \sum_{i=n-r+1}^n \lambda_i(Y) v_i v_i^\top \rangle.
 \end{aligned}$$

Here we use the fact that  $V_2^\top v_i = 0$  for all  $v_i, i = 1, \dots, n - r$ . Since  $V_{Y,r}$  and  $V_2$  are both orthonormal representation of  $\mathcal{V}_{Y,r}$ , we know there is an orthonormal matrix  $O \in \mathbb{R}^{r \times r}$  such that  $V_{Y,r} = V_2 O$ . Define the linear operator  $\text{diag} : \mathbb{S}^n \rightarrow \mathbb{R}^n$ , which takes the diagonal of a matrix. Let  $\Lambda_{Y,r} = \text{diag}^*(\lambda_{n-r+1}(Y), \dots, \lambda_n(Y))$ , we see  $R_2$  further equals to

$$\begin{aligned}
 R_2 &= \mathbf{tr} (V_2 \Delta V_2^\top V_2 O \Lambda_{Y,r} O^\top V_2^\top) \\
 & \stackrel{(a)}{=} \mathbf{tr} (\Delta O \Lambda_{Y,r} O^\top) \\
 & \stackrel{(b)}{\leq} \epsilon \lambda_{n-r+1}(Y).
 \end{aligned}$$

Here we use the cyclic property in step (a) and the step (b) is an easy consequence of  $\Delta$  has nonnegative diagonal and Von Neumann's trace inequality: for symmetric matrices  $A, B \in \mathbb{S}^r$ ,  $\langle A, B \rangle \leq \sum_{i=1}^r \lambda_i(A) \lambda_i(B)$ . Combining pieces, we find that

$$\langle X - W, Y \rangle \geq (\lambda_{n-r+1}(Y) + \delta) \epsilon - \epsilon \lambda_{n-r+1}(Y) = \delta \epsilon.$$

Now we turn to analyzing the term  $\|X - W\|_F^2$ . Using  $\langle X_1, X_2 \rangle = 0$ ,  $\langle X_1, W \rangle = 0$ , we find that

$$\|X - W\|_F^2 = \|X_1\|_F^2 + \|X_2 - W\|_F^2.$$

The second term  $\|X_2 - W\|_F^2$  satisfies

$$\|X_2 - W\|_F = \|V_2 \Delta V_2^\top\|_F^2 = \sum_{i=1}^r \Delta_{ii}^2 \leq \left( \sum_{i=1}^r \Delta_{ii} \right)^2 = \epsilon^2.$$

If we write  $X$  in terms of the coordinates given by  $V_2$  and its orthogonal complement say  $V_1$ , then in this new coordinate  $V = [V_1, V_2]$ :

$$V^\top X V = \begin{bmatrix} A & B \\ B & V_2^\top X_2 V_2 \end{bmatrix}, \quad \text{and} \quad V^\top X_1 V = \begin{bmatrix} A & B \\ B & 0 \end{bmatrix}.$$

Then  $\text{tr}(X_1) = \text{tr}(A)$ . Lemma 5 implies that

$$\|B\|_F^2 \leq \text{tr}(X_2)\text{tr}(A) = \epsilon(1 - \epsilon) = \epsilon - \epsilon^2.$$

Hence  $\|X_1\|_F^2 = \|A\|_F^2 + 2\|B\|_F^2 \leq (\text{tr}(A))^2 + 2\epsilon - 2\epsilon^2 = -\epsilon^2 + 2\epsilon$ . Combining pieces and  $\epsilon \in [0, 1]$ , we find that

$$\begin{aligned} \|X - W\|_F^2 &\leq 2\epsilon = \frac{2}{\delta}\delta\epsilon \leq \frac{2}{\delta}\langle X - W, Y \rangle \\ \implies \langle X - W, Y \rangle &\geq \frac{\delta}{2}\|X - W\|_F^2. \end{aligned}$$

□

**Lemma 5.** Suppose  $Y = \begin{bmatrix} A & B \\ B^\top & D \end{bmatrix} \succeq 0$ . Then  $\|A\|_{\text{op}}\text{tr}(D) \geq \|BB^\top\|_* = \text{tr}(BB^\top) = \|B\|_F^2$ .

*Proof.* For any  $\epsilon > 0$ , denote  $A_\epsilon = A + \epsilon I$  and  $Y_\epsilon = \begin{bmatrix} A_\epsilon & B \\ B^* & D \end{bmatrix}$ . We know  $Y_\epsilon$  is psd, as is its Schur complement  $D - B^\top A_\epsilon^{-1} B \succeq 0$  with trace  $\text{tr}(D) - \text{tr}(A_\epsilon^{-1} B B^\top) \geq 0$ .

Von Neumann’s lemma for  $A_\epsilon, B B^\top \succeq 0$  shows  $\text{tr}(A_\epsilon^{-1} B B^*) \geq \frac{1}{\|A_\epsilon\|_{\text{op}}}\|B B^\top\|_*$ . Use this with the previous inequality to see  $\text{tr}(D) \geq \frac{1}{\|A_\epsilon\|_{\text{op}}}\|B B^\top\|_*$ . Multiply by  $\|A_\epsilon\|_{\text{op}}$  and let  $\epsilon \rightarrow 0$  to complete the proof. □

## F. Lemmas for Section 4

We first give a self-contained proof for the second case of Theorem 6.

*Proof of second case of Theorem 6.* For any feasible  $X$  and the optimal solution  $X_*$ , we have

$$\begin{aligned} f(X) - f(X_*) &\stackrel{(a)}{\geq} \langle \nabla f(X_*), X - X_* \rangle \\ &\stackrel{(b)}{=} \langle Z_* + s_* I, X - X_* \rangle \\ &\stackrel{(c)}{=} \langle Z_*, X - X_* \rangle. \end{aligned}$$

Here step (a) is due to the convexity of  $f$ . For step (b), we use the first order condition of KKT condition (3). The step (c) is due to feasibility of  $X$  and  $X_*$ .

Since  $Z_*$  has rank  $n - 1$ , using strict complementarity, we reach that any optimal solution  $X_*$  has rank 1 with  $\text{range}(X_*) = \text{nullspace}(Z_*)$ . Thus any optimal solution  $X_*$  is of the form  $X_* = \xi v v^\top$ ,  $v$  is the non-zero unit vector in the null space of  $Z_*$ , and  $\xi$  is a nonnegative scalar. Since  $X_*$  has to be feasible, the constraint  $\text{tr}(X_*) = 1$  implies that  $\xi = 1$  and hence the solution  $X_*$  is unique. The same argument implies that the set  $\mathcal{C}_1(Z_*) = \{X_*\}$ . Hence using Lemma 5 and  $\lambda_n(Z_*) = 0$ , we see that

$$f(X) - f(X_*) \geq \langle Z_*, X - X_* \rangle \geq \frac{\lambda_{n-1}(Z_*)}{2}\|X - X_*\|_F^2.$$

□

Next, we establish the lemma that is core to the proof of Theorem 6 under the assumption of uniqueness.

**Lemma 6.** Suppose the following system admits a unique solution  $X_*$  with rank  $r_*$  :

$$\langle Z_*, X_* \rangle = 0, \mathcal{A}X = b, \quad \text{and} \quad X \succeq 0, \quad (16)$$

for a  $Z_* \succeq 0$  such that  $\text{rank}(Z_*) + \text{rank}(X_*) = n$ , a linear map  $\mathcal{A} : \mathbb{S}^n \rightarrow \mathbb{R}^m$ , and a vector  $b \in \mathbb{R}^m$ . Further suppose that  $\mathcal{A}X = b \implies \text{tr}(X) = 1$ . Then for any  $X \succeq 0$  with  $\text{tr}(X) = 1$ , we have

$$\begin{aligned} \|X - X_*\|_F^2 &\leq \left(4 + 8 \frac{\sigma_{\max}(\mathcal{A})}{\sigma_{\min}(\mathcal{A}_V)}\right) \frac{\langle Z_*, X \rangle}{\lambda_{n-r_*}(Z_*)} \\ &\quad + \frac{4}{\sigma_{\min}^2(\mathcal{A}_V)} \|\mathcal{A}(X) - b\|_2^2. \end{aligned} \quad (17)$$

*Proof.* Let  $V \in \mathbb{R}^{n \times r_*}$  be a matrix with orthonormal columns corresponding to the eigenspace  $\mathcal{V}$  of  $X_*$  of positive eigenvalues. Then  $X_*$  can be written as  $X_* = V S_* V^\top$  for some  $S_* \in \mathbb{S}^{r_*}$  such that  $S_* \succ 0$ . We claim that the linear map  $\mathcal{A}_V$  defined as follows is injective:

$$\begin{aligned} \mathcal{A}_V : \mathbb{S}^{r_*} &\rightarrow \mathbb{R}^m \\ S &\mapsto \mathcal{A}(V S V^\top). \end{aligned}$$

Suppose not, then there is some nonzero  $S_0 \in \mathbb{S}^{r_*}$  such that  $\mathcal{A}_V(S_0) = 0$ . Then  $V(\alpha S_0 + S_*)V^\top$  also satisfies the system (16) for all small enough  $\alpha$ . Hence we see that for any  $S \in \mathbb{S}^{r_*}$

$$\begin{aligned} \|V S V^\top - X_*\|_F &\leq \frac{1}{\sigma_{\min}(\mathcal{A}_V)} \|\mathcal{A}(V S V^\top) - \mathcal{A}(X_*)\|_2 \\ &= \frac{1}{\sigma_{\min}(\mathcal{A}_V)} \|\mathcal{A}(V S V^\top) - b\|_2. \end{aligned} \quad (18)$$

Here  $\sigma_{\min}(\mathcal{A}_V) = \min_{\|S\|_F=1} \|\mathcal{A}_V(S)\|_2 > 0$ .

Using strict complementarity on  $Z_*$  and  $X_*$ , we know  $V$  is also a representation of the null space of the  $Z_*$ . Using Lemma 5, we know there is some  $W = V S V^\top \in \mathcal{C}_{r_*}(Z_*)$  such that

$$\langle X, Z_* \rangle \stackrel{(a)}{=} \langle X - W, Z_* \rangle \geq \frac{\lambda_{n-r_*}(Z_*)}{2} \|X - W\|_F^2, \quad (19)$$

where step (a) is because  $\lambda_{n-r_*+1}(Z_*) = \dots = \lambda_n(Z_*) = 0$ . We note if  $r_* = 1$ , then  $\mathcal{C}_r(Z_*)$  has  $X_*$  as its only element, as  $\text{tr}(X) = 1$  and we are done.

We can bound  $\|X - X_*\|_F^2$  by

$$\begin{aligned} \|X - X_*\|_F^2 &\stackrel{(a)}{\leq} 2\|X - W\|_F^2 + 2\|W - X_*\|_F^2 \\ &\stackrel{(b)}{\leq} 2\|X - W\|_F^2 + \frac{2}{\sigma_{\min}^2(\mathcal{A}_V)} \|\mathcal{A}(W) - b\|_2^2. \end{aligned} \quad (20)$$

Here we use triangle inequality and basic inequality  $(a+c)^2 \leq 2a^2 + 2c^2$  for any real  $a, c$  in step (a). In step (b), we use (18).

We can further bound the term  $\|\mathcal{A}(W) - b\|_2$  by

$$\begin{aligned} \|\mathcal{A}(W) - b\|_2 &= \|\mathcal{A}(W - X) + \mathcal{A}(X) - b\|_2 \\ &\leq \|\mathcal{A}(W - X)\|_2 + \|\mathcal{A}(X) - b\|_2. \end{aligned} \quad (21)$$

Now combining (20), (21) and  $(a + c)^2 \leq 2a^2 + 2c^2$  for any  $a, c \in \mathbb{R}$  in the following step (a), we see

$$\begin{aligned} \|X - X_\star\|_{\mathbb{F}}^2 &\stackrel{(a)}{\leq} 2\|X - W\|_{\mathbb{F}}^2 + \frac{4\|\mathcal{A}(W - X)\|_2^2}{\sigma_{\min}^2(\mathcal{A}_V)} \\ &\quad + \frac{4}{\sigma_{\min}^2(\mathcal{A}_V)} \|\mathcal{A}(X) - b\|_2^2 \\ &\leq \left(2 + 4\frac{\sigma_{\max}^2(\mathcal{A})}{\sigma_{\min}^2(\mathcal{A}_V)}\right) \|X - W\|_{\mathbb{F}}^2 \\ &\quad + \frac{4}{\sigma_{\min}^2(\mathcal{A}_V)} \|\mathcal{A}(X) - b\|_2^2. \end{aligned}$$

Finally using (19) to bound  $\|X - W\|_{\mathbb{F}}$ , we reached the inequality we want to prove:

$$\begin{aligned} \|X - X_\star\|_{\mathbb{F}}^2 &\leq \left(4 + 8\frac{\sigma_{\max}^2(\mathcal{A})}{\sigma_{\min}^2(\mathcal{A}_V)}\right) \frac{\langle Z_\star, X \rangle}{\lambda_{n-r_\star}(Z_\star)} \\ &\quad + \frac{4}{\sigma_{\min}^2(\mathcal{A}_V)} \|\mathcal{A}(X) - b\|_2^2. \end{aligned}$$

□

We now establish a lemma to handle the general case that the solution might not be unique. For a convex closed set  $\mathcal{X}_\star$ , we define the distance to for an arbitrary  $X \in \mathbb{S}^n$  to it as

$$\text{dist}(X, \mathcal{X}_\star) := \inf_{X_\star \in \mathcal{X}_\star} \|X - X_\star\|_{\mathbb{F}}.$$

**Lemma 7.** *Denote the solution set of the following system as  $\mathcal{X}_\star$ :*

$$\langle Z_\star, X_\star \rangle = 0, \mathcal{A}X = b, \quad \text{and} \quad X \succeq 0, \quad (22)$$

for a  $Z_\star \succeq 0$ , a linear map  $\mathcal{A} : \mathbb{S}^n \rightarrow \mathbb{R}^m$ , and a vector  $b \in \mathbb{R}^m$ . Suppose the system (16) admits a solution  $X_\star^0$  with rank  $r_\star^0 \geq 1$  such that  $\text{rank}(Z_\star) + \text{rank}(X_\star^0) = n$ . Further suppose that  $\mathcal{A}X = b \implies \text{tr}(X) = 1$ . Then the constant  $\mu := \sup\{a \geq 0 \mid a \cdot \text{dist}(X, \mathcal{X}_\star) \leq \|\mathcal{A}(X) - b\|_2 \text{ for all } X \in \mathcal{C}_{r_\star}(Z_\star)\}$  is positive, and for any  $X \succeq 0$  with  $\text{tr}(X) = 1$ , we have

$$\begin{aligned} \text{dist}(X, \mathcal{X}_\star)^2 &\leq \left(4 + 8\frac{\sigma_{\max}(\mathcal{A})}{\mu}\right) \frac{\langle Z_\star, X \rangle}{\lambda_{n-r_\star}(Z_\star)} \\ &\quad + \frac{4}{\mu^2} \|\mathcal{A}(X) - b\|_2^2. \end{aligned} \quad (23)$$

*Proof.* Let  $V \in \mathbb{R}^{n \times r_\star}$  be a matrix with orthonormal columns corresponding to the eigenspace  $\mathcal{V}$  of  $r_\star$  zero eigenvalues. Consider the linear map  $\mathcal{A}_V$ :

$$\begin{aligned} \mathcal{A}_V : \mathbb{S}^{r_\star} &\rightarrow \mathbb{R}^m \\ S &\mapsto \mathcal{A}(VSV^\top). \end{aligned}$$

The key replacement of multiple solution setting is to establish an inequality similar to (18), which depicts the injectivity of  $\mathcal{A}_V$  for unique solution setting.

Define the solution set  $\mathcal{S} \subset \mathbb{S}^{r_\star}$  of the following system:

$$\mathcal{A}_V(S) = b, \quad S \succeq 0. \quad (24)$$

Note that any  $S \in \mathcal{S}$  satisfies that  $VSV^\top \in \mathcal{X}_\star$ . Conversely, for any  $X_\star \in \mathcal{X}_\star$ , it can be written as  $X_\star = VS_\star V^\top$  for some  $S_\star \in \mathbb{S}^{r_\star}$  such that  $S_\star \succeq 0$  and  $\mathcal{A}_V(S_\star) = b$ . Hence we have  $\mathcal{X}_\star = \{X \mid X = VSV^\top, S \in \mathcal{S}\}$ .



Now if we take the  $X_*^0 \in \mathcal{X}_*$  such that  $\text{rank}(Z_*) + \text{rank}(X_*^0) = n$ , then  $X_*^0 = VS_*^0V^\top$  for some  $S_*^0 \in \mathbb{S}^{r_*}$  such that  $S_*^0 \succ 0$ . This means the system (24) satisfies the condition in Corollary 3 in (Bauschke et al., 1999). By applying this corollary to (24), we know there is a  $\mu > 0$  such that for all  $S \succeq 0$  and  $\text{tr}(S) = 1$ ,

$$\text{dist}(S, \mathcal{S}) \leq \frac{1}{\mu} \|\mathcal{A}_V S - b\|_2. \quad (25)$$

Translating the inequality to the space  $\mathcal{L} = \{X \in \mathbb{S} \mid X = VSV^\top \text{ for some } S \in \mathbb{S}^{r_*}\}$ , we have for all  $X \succeq 0$ ,  $\text{tr}(X) = 1$ , and  $X \in \mathcal{L}$ , i.e.,  $X \in \mathcal{C}_{r_*}(Z_*)$ :

$$\text{dist}(X, \mathcal{X}_*) \leq \frac{1}{\mu} \|\mathcal{A}(X) - b\|_2. \quad (26)$$

This is our replacement of (18) in Lemma 6.

Following the proof of Lemma 6, we know there is some  $W = VSV^\top \in \mathcal{C}_{r_*}(Z_*)$  such that

$$\langle X, Z_* \rangle = \langle X - W, Z_* \rangle \geq \frac{\lambda_{n-r_*}(Z_*)}{2} \|X - W\|_F^2. \quad (27)$$

To bound  $\text{dist}(X, \mathcal{X}_*)$ , we pick an  $X_* \in \mathcal{X}_*$  such that it is nearest to  $W$  (note  $\mathcal{X}_*$  is compact as  $\mathcal{A}(X) = b$  implies  $\text{tr}(X) = 1$ ). Then we have

$$\text{dist}(X, \mathcal{X}_*)^2 \leq \|X - X_*\|_F^2 \quad (28)$$

$$\stackrel{(a)}{\leq} 2\|X - W\|_F^2 + 2\|W - X_*\|_F^2 \quad (29)$$

$$\stackrel{(b)}{\leq} 2\|X - W\|_F^2 + \frac{2}{\mu^2} \|\mathcal{A}(W) - b\|_2^2.$$

Here we use triangle inequality and basic inequality  $(a + c)^2 \leq 2a^2 + 2c^2$  for any real  $a, c$  in step (a). In step (b), we use (18). The rest of the proof is exactly the same as those in Lemma 6.  $\square$

The following Lemma establishes the linear convergence of G-BlockFW under quadratic growth condition.

**Lemma 8.** *Suppose  $f$  of Problem (1) is  $\beta$  smooth and Problem (1) satisfies quadratic growth with parameter  $\gamma$ . If  $\eta = \frac{\gamma}{\beta}$  and  $k \geq r_* = \text{rank}(X_*)$ , where  $X_*$  is an optimal solution of Problem (1), then the generalized Block FW 2 converges linearly:*

$$h_{t+1} \leq \left(1 - \frac{\gamma}{2\beta}\right) h_t,$$

where  $h_t = f(X_t) - f(X_*)$  for each  $t$ .

*Proof.* Denote  $\hat{Y} = V \text{diag}(\Lambda) V^\top$ . The Lipschitz smoothness of  $f$  shows that

$$f(X_{t+1}) \leq f(X_t) + \eta \langle \hat{Y} - X_t, \nabla f(X_t) \rangle + \frac{\eta^2 \beta}{2} \|\hat{Y} - X_t\|_F^2. \quad (30)$$

Using a similar argument as Allen-Zhu et al. (2017, Lemma 3.1), we have

$$\hat{Y} = \arg \min_{Y \in \mathcal{S}_n, \text{rank}(Y) \leq r_*} \eta \langle \hat{Y} - X_t, \nabla f(X_t) \rangle + \frac{\eta^2 \beta}{2} \|\hat{Y} - X_t\|_F^2.$$

Hence, we can replace  $\hat{Y}$  in (30) by  $X_*$  in the following step (a),

$$\begin{aligned} f(X_{t+1}) &\stackrel{(a)}{\leq} f(X_t) + \eta \langle X_* - X_t, \nabla f(X_t) \rangle + \frac{\eta^2 \beta}{2} \|X_* - X_t\|_F^2 \\ &\stackrel{(b)}{\leq} f(X_t) - \eta(f(X_t) - f(X_*)) + \frac{\eta^2 \beta}{2\gamma} (f(X_t) - f(X_*)), \end{aligned} \quad (31)$$

where step (b) is due to the quadratic growth of Problem (1). Now subtract both sides by  $f(X_*)$ , and let  $h_t = f(X_t) - f(X_*)$  for each  $t$ , we find that

$$h_{t+1} \leq \left(1 - \eta + \frac{\eta^2 \beta}{2\gamma}\right) h_t.$$

Our choice  $\eta = \frac{\gamma}{\beta}$  set  $(1 - \eta + \frac{\eta^2 \beta}{2\gamma}) = 1 - \frac{\gamma}{2\beta}$  which is what we desired.  $\square$

## G. Additional Numerics

We include extra numerics for  $n = 100, 200, 400$  in Figure 1, 2. As can be seen, SpecFW in these cases are a bit slower than G-BlockFW when  $\tau = 0.5$  and  $c = 0.5$ . SpecFW is as good as FW when  $k$  is miss specified.

**What if  $\nabla f(X_*) = 0$ ?** Here we also discuss an interesting situation that  $c = 0$ , and  $\tau = 1$ , then we see  $X_* = U_{\mathfrak{q}}U_{\mathfrak{q}}^{\top}$  is an optimal solution and gradient in this case is 0. Such situation means strict complementarity fails and the small perturbation to  $\tau$  will result in a higher-rank solution, meaning the convex relaxation (20) is ill-posed for the purpose of low-rank matrix recovery [Lemma 2](Garber, 2019). Indeed, this is where SpecFW is not advantageous comparing to G-BlockFW as shown in Figure 3.  $\tau = 1$  and  $c = 0$ .

## References

- Allen-Zhu, Z., Hazan, E., Hu, W., and Li, Y. Linear convergence of a frank-wolfe type algorithm over trace-norm balls. In *Advances in Neural Information Processing Systems*, pp. 6191–6200, 2017.
- Bauschke, H. H., Borwein, J. M., and Li, W. Strong conical hull intersection property, bounded linear regularity, jameson’s property (g), and error bounds in convex optimization. *Mathematical Programming*, 86(1):135–160, 1999.
- Drusvyatskiy, D. and Lewis, A. S. Generic nondegeneracy in convex optimization. *Proceedings of the American Mathematical Society*, pp. 2519–2527, 2011.
- Garber, D. Linear convergence of frank-wolfe for rank-one matrix recovery without strong convexity. *arXiv preprint arXiv:1912.01467*, 2019.
- Tropp, J. A., Yurtsever, A., Udell, M., and Cevher, V. Practical sketching algorithms for low-rank matrix approximation. *SIAM Journal on Matrix Analysis and Applications*, 38(4):1454–1485, 2017.
- Yurtsever, A., Udell, M., Tropp, J., and Cevher, V. Sketchy decisions: Convex low-rank matrix optimization with optimal storage. In *Artificial Intelligence and Statistics*, pp. 1188–1196, 2017.

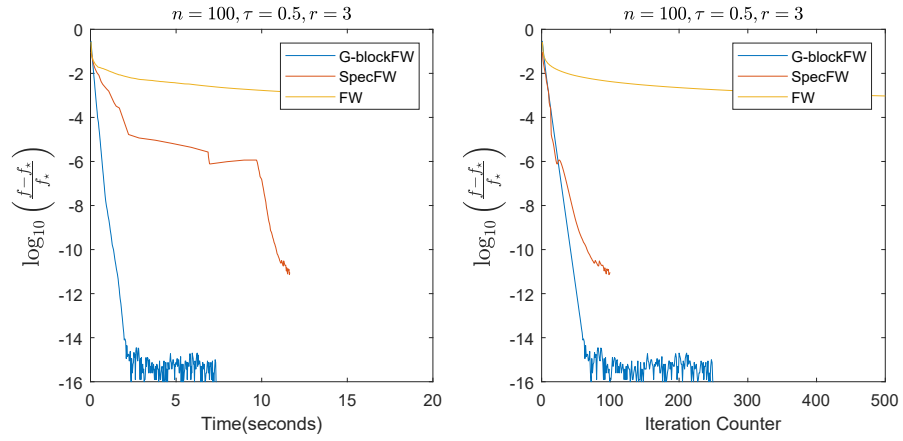

(a)  $n = 100$

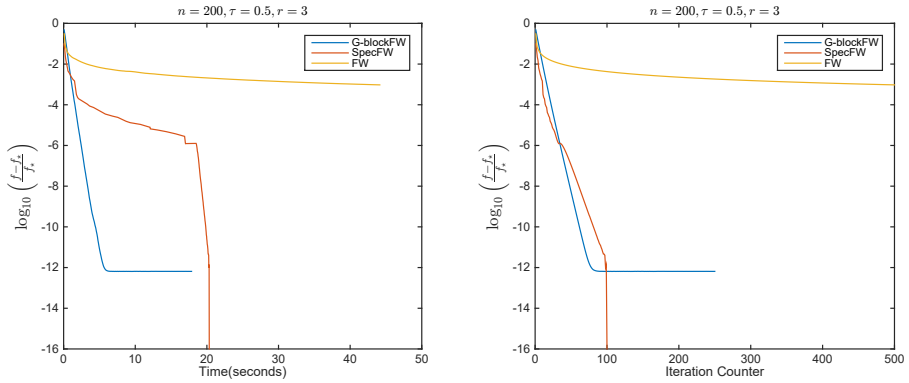

(b)  $n = 200$

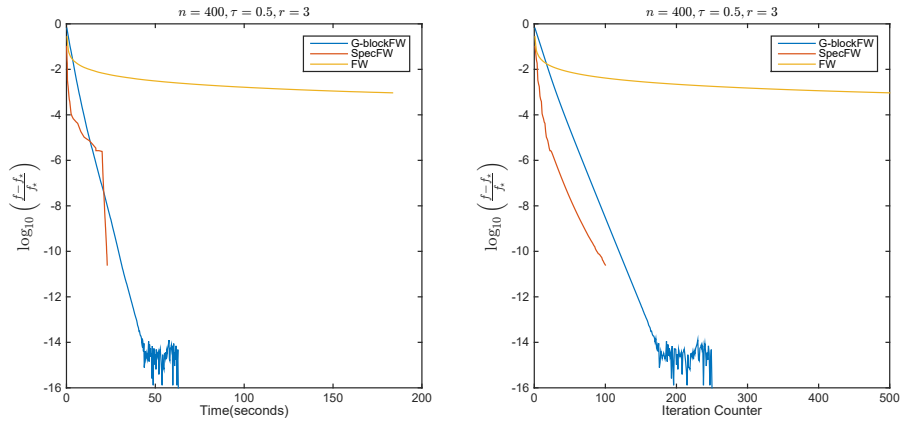

(c)  $n = 400$

Figure 1. Comparison of algorithms under  $\tau = \frac{1}{2}$  and noise level  $c = 0.5$ .

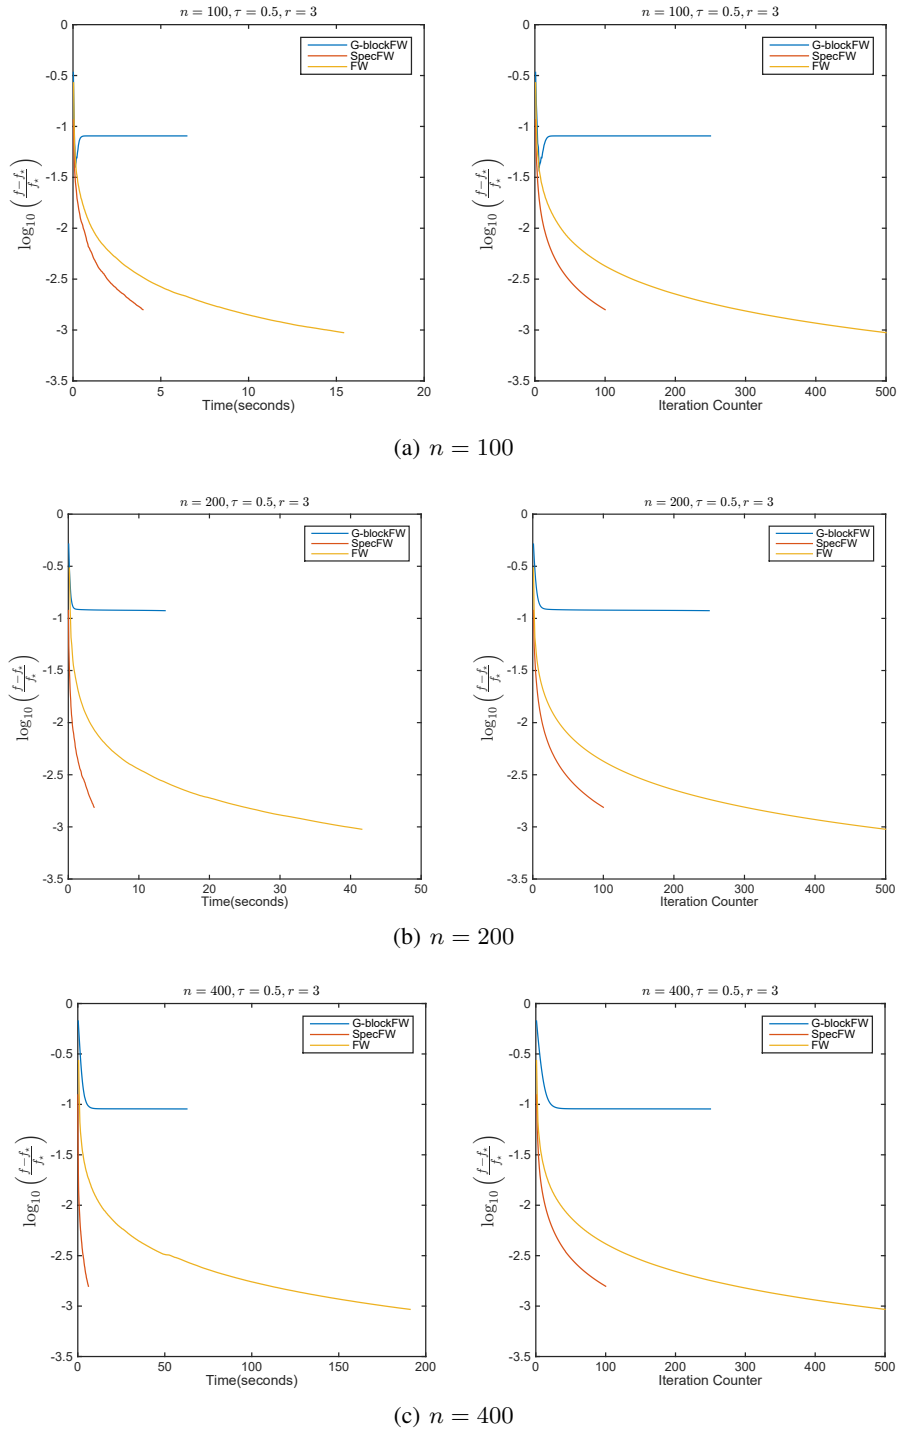

Figure 2. Comparison of algorithms under  $\tau = \frac{1}{2}$ , noise level  $c = 0.5$ , and  $k = 2 < r_*$ .

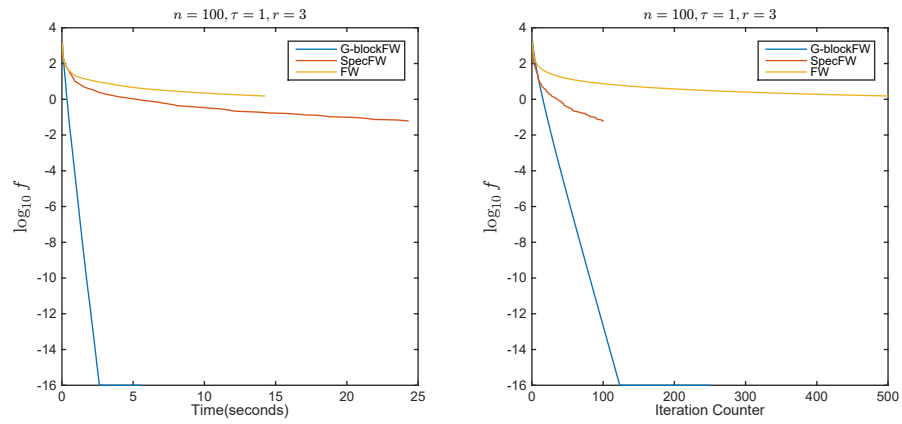

(a)  $n = 100$

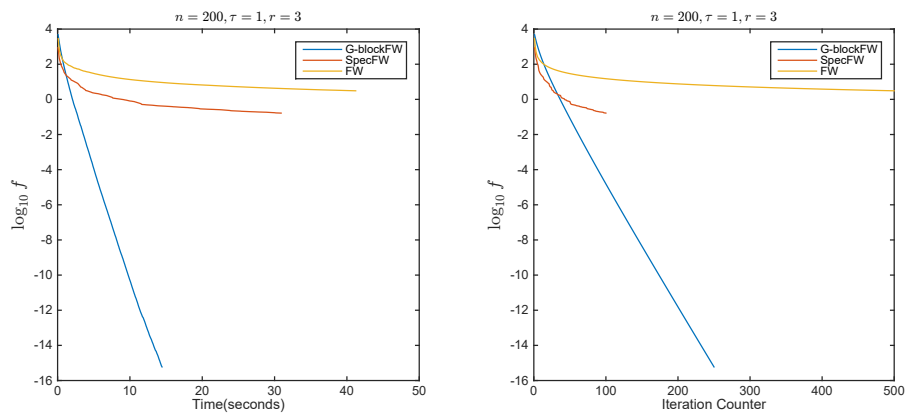

(b)  $n = 200$

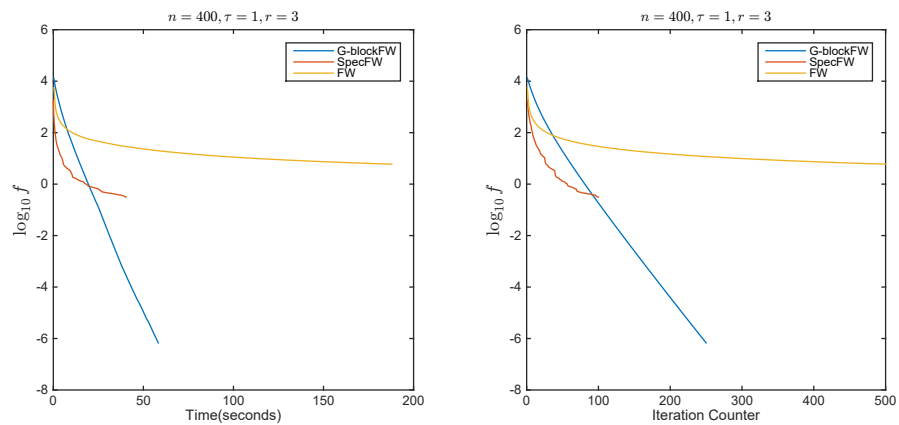

(c)  $n = 400$

Figure 3. Comparison of algorithms under  $\tau = 1$ , noise level  $c = 0$ , and  $k = 4 > r_*$ .
